# Supplementary material
Source: publisher figshare collection journal article supplement (https://acs.figshare.com/ndownloader/files/4530103)
Supplement: Supplementary file 1 [file 4530103]

## Supporting Information

### Growth of Au Nanowires at the Air/Water Interface

Zhichuan Xu,<sup>††</sup> Chengmin Shen,<sup>‡</sup> Shouheng Sun,<sup>\*,†</sup> Hongjun Gao<sup>\*,†</sup>

*Beijing National Laboratory for Condensed Matter Physics, Institute of Physics, Chinese Academy of Sciences, Beijing, China 100080 and Department of Chemistry, Brown University, Providence RI 02912*

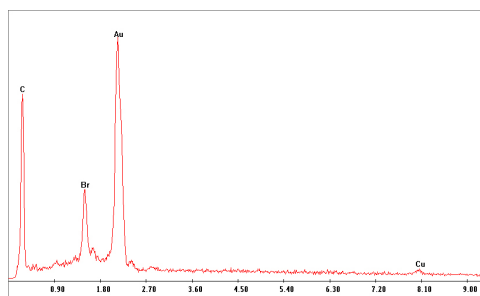

**Figure S1.** The EDX spectrum of as-synthesized Au nanowires. Br is from CTAB and Cu is from the TEM grid.

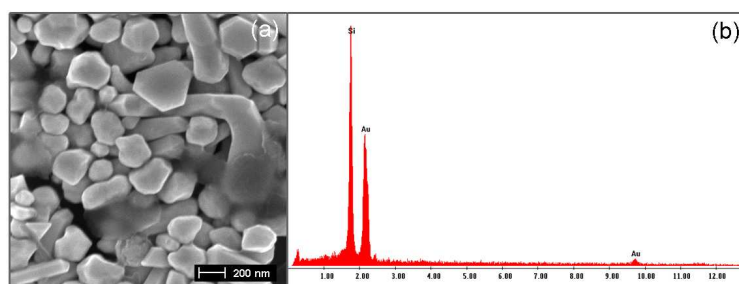

**Figure S2.** (a) SEM image and (b) EDX spectra of large sized Au nanoparticles in bulk solution. The sample was dried on a silicon wafer.

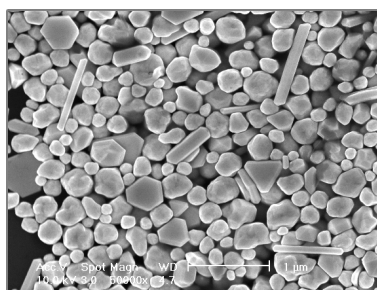

**Figure S3.** SEM image of large sized Au nanocrystals produced in bulk solution in the absence of Au islands for aging over 1 day.

\* Corresponding authors. E-mail: ssun@brown.edu; hjgao@aphy.iphy.ac.cn

<sup>‡</sup> Institute of Physics, Chinese Academy of Sciences.

<sup>†</sup> Brown University.
